# Supplementary material for: Plasminogen activator inhibitor-1 is an independent prognostic factor of ovarian cancer and IMD-4482, a novel plasminogen activator inhibitor-1 inhibitor, inhibits ovarian cancer peritoneal dissemination
Source: PubMed Central journal article supplement (PMC5685717; doi:10.18632/oncotarget.20834), 2017-09-12
Supplement: oncotarget-08-89887-s001.pdf [file oncotarget-08-89887-s001.pdf]

# Plasminogen activator inhibitor-1 is an independent prognostic factor of ovarian cancer and IMD-4482, a novel plasminogen activator inhibitor-1 inhibitor, inhibits ovarian cancer peritoneal dissemination

## SUPPLEMENTARY MATERIALS

### tPA Binding assay

75 nM of recombinant PAI-1 and different dose of IMD-4482 were mixed and incubated in PBS at 37°C for 5 min, and then 150 nM of tPA was added. After incubation in PBS at 37°C for 5 min, samples were applied for 10% SDS-PAGE and visualized with a silver staining. The bands of tPA/PAI-1 complex were quantified by a densitometry.

### Plasminogen zymography

Plasminogen zymography was performed as previously described [1] [2]. Briefly, 90-100% confluent cells were cultured in serum free DMEM with increasing concentrations of IMD-4482 for 24 h, and conditioned medium were collected. Samples were centrifuged at 4000 rpm for 10 min at 4°C, and protein concentrations were measured using the Bradford method-based Bio-Rad assay. Protein extracts (30 µg) were separated on 10% SDS-PAGE containing 0.2 mg/ml casein and 20 µg/ml human plasminogen (Wako Pure Chemical Industries, Ltd., Osaka, Japan). Gels were washed twice for 30 min in 2.5% Triton X-100 to remove the SDS and then incubated overnight in the incubation buffer [50 mM Tris-HCl (pH 7.6), 0.15 M NaCl, 10 mM CaCl<sub>2</sub>, 0.05% NaN<sub>3</sub>] overnight at 37°C. Finally, gels were stained with Coomassie blue and then destained until contrast was satisfactory.

### Establishment of chemoresistant cell lines

Two paclitaxel-resistant cell lines, namely SKOV3ip1/T and HeyA8/T cells were developed in our

laboratory by continuously exposing their parental cells to paclitaxel. Cells were initially exposed to a paclitaxel concentration of 1 nM, and after the cells had regained their exponential growth rate, the concentration of paclitaxel was increased gradually, and the procedure was repeated until the concentration was 300 nM.

### MTS assay

Cell viabilities were determined by MTS assay with CellTiter 96 AQueous One Solution Reagent (Promega, Madison, WI, USA) according to the manufacturer's instruction. Cells were plated in 96-well plates, and exposed to paclitaxel at increasing concentrations for 48 hours before the assays were performed. After the addition of MTS for 1 hour, the number of surviving cells was assessed by measure the absorbance at 490 nm. Each experiments were repeated at least three times.

## REFERENCES

1. Heussen C, Dowdle EB. Electrophoretic analysis of plasminogen activators in polyacrylamide gels containing sodium dodecyl sulfate and copolymerized substrates. *Anal Biochem.* 1980; 102:196–202.
2. Adhami F, Yu D, Yin W, Schloemer A, Burns KA, Liao G, Degen JL, Chen J, Kuan CY. Deleterious effects of plasminogen activators in neonatal cerebral hypoxia-ischemia. *Am J Pathol.* 2008; 172:1704–16.

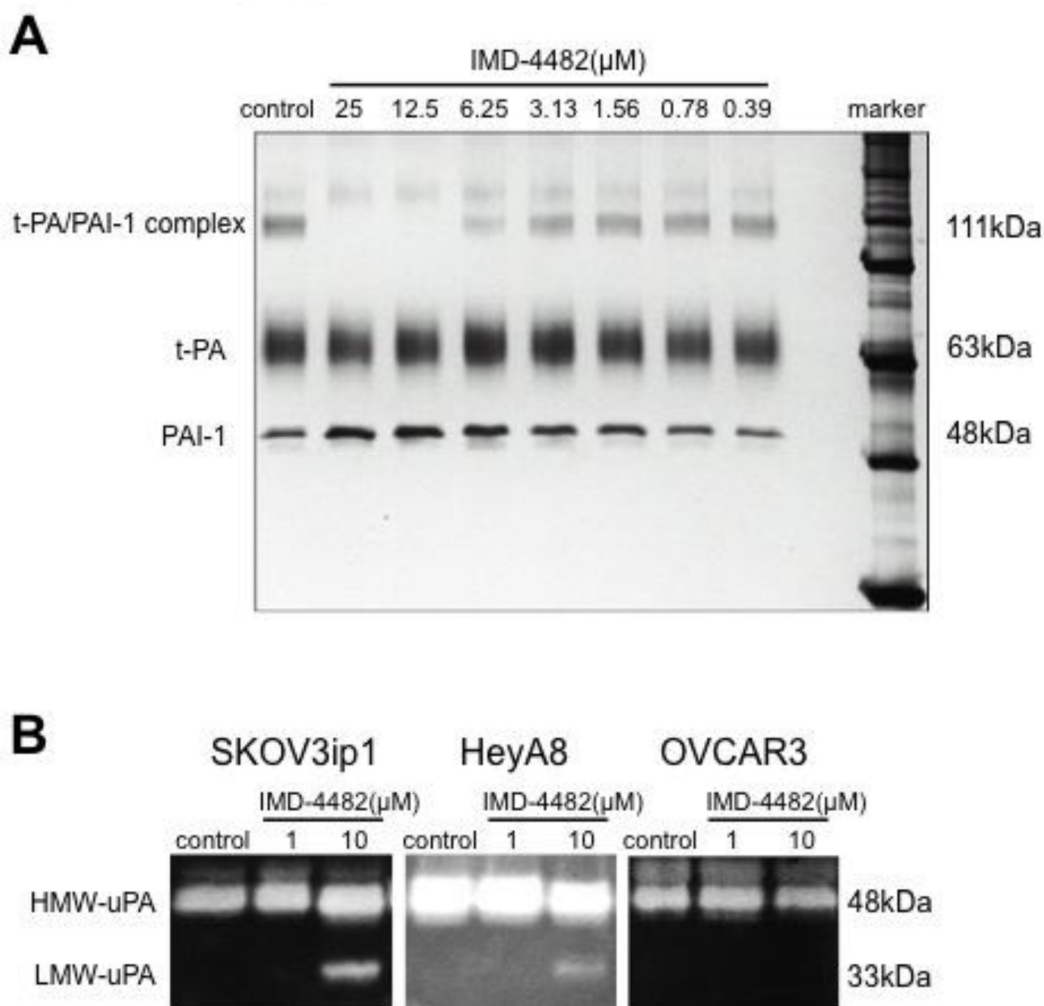

**Supplementary Figure 1: The effect of IMD-4482 on tPA and uPA activity.** Inhibitory effects of IMD-4482 on the binding of tPA and PAI-1 (A). The recombinant PAI-1 and IMD-4482 were mixed, and then tPA was added. After incubation at 37°C for 5 min, samples were applied for 10% SDS-PAGE and visualized with a silver staining. Plasminogen zymography (B). Cells were treated with or without IMD-4482 for 24 hours, and supernatants were resolved by electrophoresis on plasminogen plus casein gel. The gels were rinsed with 2.5% Triton X-100 and were stained with 0.25% coomassie blue.

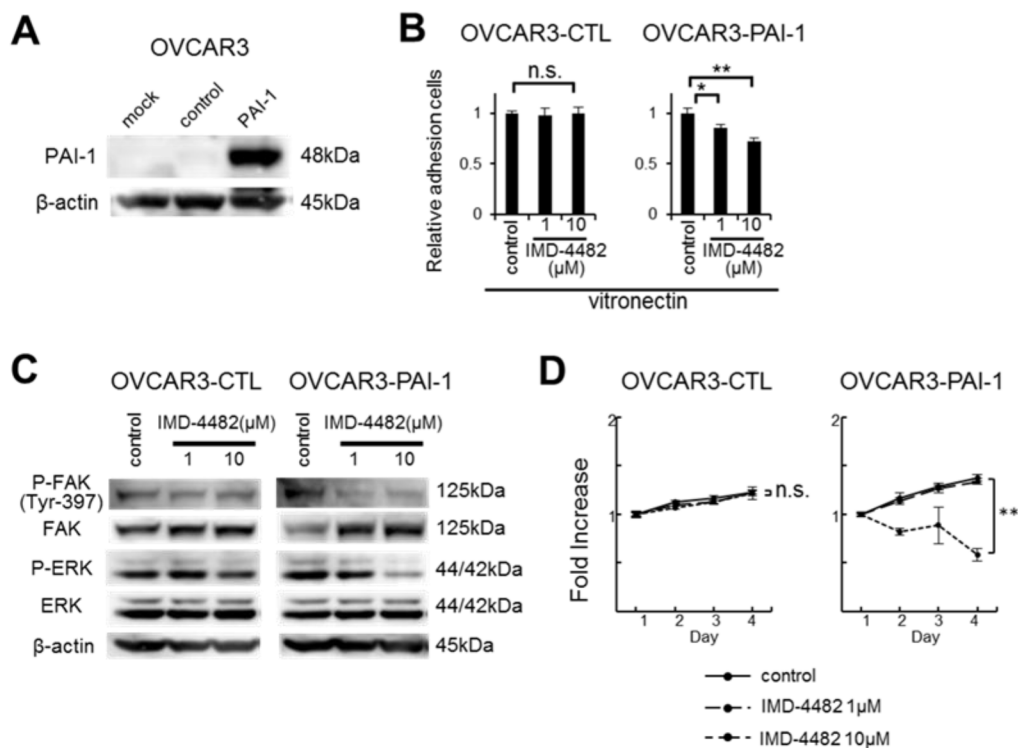

**Supplementary Figure 2: Western Blot (A).** Control vector (control) or PAI-1 expression vector (PAI-1) was transfected into OVCAR-3 cells. Cell lysates were immunoblotted with an antibody against PAI-1.  $\beta$ -actin was used as a loading control. *In vitro* adhesion assay (B). A total of  $1 \times 10^5$  OVCAR-3 cells transfected with control vector (OVCAR3-CTL) or PAI-1 expression vector (OVCAR3-PAI-1) were plated onto vitronectin-coated 96-well plates. After incubation for 50 minutes, plates were washed to discard non-adherent cells, and the relative number of attached cells was measured, Data represents mean  $\pm$  SD, n = 5 from triplicate independent experiments. Western blot (C). Cells were incubated with or without IMD-4482 for 24 hours. Cell lysates were immunoblotted with an antibody against PARP, p-FAK (Tyr-397), FAK, p-ERK, and ERK.  $\beta$ -actin was used as a loading control. *In vitro* cell proliferation assay (D). OVCAR3 cells transfected with control vector (OVCAR3-CTL) or PAI-1 expression vector (OVCAR3-PAI-1) were plated onto 96-well plates and cultured in DMEM containing 2% FBS with or without IMD-4482. \*\*, P < 0.01; n.s., not significant.

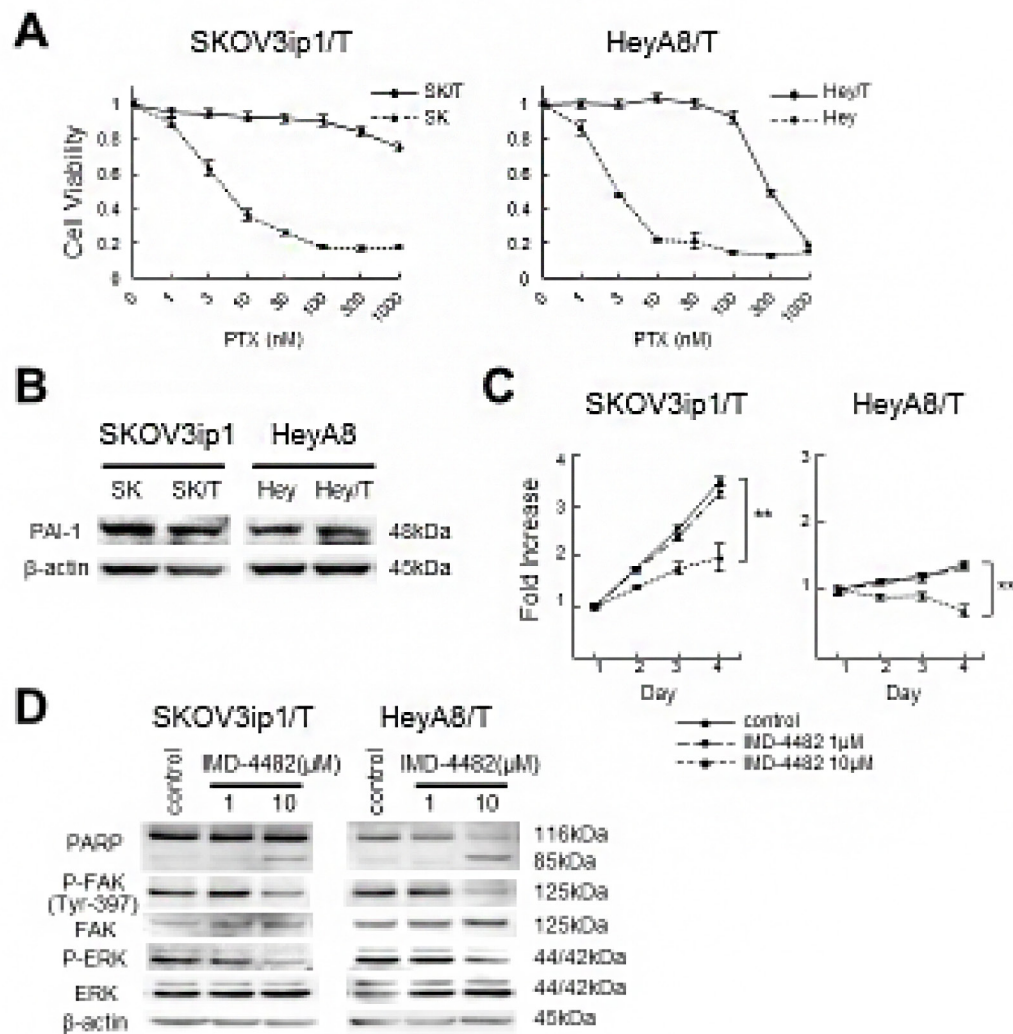

**Supplementary Figure 3: IMD-4482 caused apoptosis in paclitaxel-resistant ovarian cancer cell lines.** Establishment of paclitaxel resistant ovarian cancer cell lines (A). Viability of SKOV3ip1, SKOV3ip1/T, HeyA8 and HeyA8/T cells exposed to PTX for 96 hr (SKOV3ip1) or 72 hr (HeyA8) was determined using MTS assay. Western blot (B). PAI-1 expression in paclitaxel-resistant cells was analyzed.  $\beta$ -Actin was used as a loading control. Cell proliferation assay (C). Cell proliferation was measured as previously described. (D) Paclitaxel-resistant cells were treated with or without IMD-4482 for 24 hours. Cell lysates were immunoblotted with an antibody against PARP, p-FAK (Tyr-397), FAK, p-ERK, ERK.  $\beta$ -Actin was used as a loading control.

**Supplementary Table 1: Clinicopathological characteristics of patients with serous adenocarcinoma**

| <b>Number of patients</b>                             | <b>54</b>  |
|-------------------------------------------------------|------------|
| Median age, y (range)                                 | 62 (29-88) |
| Median observation time of patients alive, mo (range) | 25 (3-78)  |
| FIGO stage, n (%)                                     |            |
| I                                                     | 11 (20.3)  |
| II                                                    | 1 (1.9)    |
| III                                                   | 28 (51.9)  |
| IV                                                    | 14 (25.9)  |
| Residual tumor (cm), n (%)                            |            |
| ≤1                                                    | 36 (66.7)  |
| >1                                                    | 18 (33.3)  |
| Prior chemotherapy, n (%)                             |            |
| Yes                                                   | 9 (16.7)   |
| No                                                    | 45 (83.3)  |
| Adjuvant chemotherapy, n (%)                          |            |
| TC / ddTC                                             | 46 (85.2)  |
| PTX                                                   | 1 (1.9)    |
| None                                                  | 7 (13.0)   |
| Vital status, n (%)                                   |            |
| Living                                                | 36 (66.7)  |
| Decreased                                             | 18 (33.3)  |
| PAI-1 staining, n (%)                                 |            |
| Weak (1+)                                             | 9 (16.7)   |
| Moderate (2+)                                         | 8 (14.8)   |
| Strong (3+)                                           | 37 (68.5)  |

**Supplementary Table 2: PAI-1 staining scores in all histological types**

| <b>Histological type</b>        | <b>PAI-1 staining</b> |                 |                     |                   |
|---------------------------------|-----------------------|-----------------|---------------------|-------------------|
|                                 | <b>n</b>              | <b>Weak (%)</b> | <b>Moderate (%)</b> | <b>Strong (%)</b> |
| Serous papillary adenocarcinoma | 54                    | 9 (16.7)        | 7 (13.0)            | 38 (70.4)         |
| Endometrioid adenocarcinoma     | 22                    | 3 (13.6)        | 2 (9.1)             | 17 (77.3)         |
| Clear cell carcinoma            | 37                    | 10 (27.0)       | 5 (13.5)            | 22 (59.5)         |
| Mucinous adenocarcinoma         | 20                    | 2 (10.0)        | 4 (20.0)            | 14 (70.0)         |
| Others                          | 21                    | 0 (0)           | 8 (38.1)            | 13 (61.9)         |
